# Supplementary material
Source: PubMed Central journal article supplement (PMC4228696)
Supplement: NIHMS632225-supplement-1.pdf [file NIHMS632225-supplement-1.pdf]

## Supplementary Data

### The mTORC1 Effectors S6K1 and 4E-BP Play Different Roles in CNS Axon Regeneration

Liu Yang<sup>1</sup>, Linqing Miao<sup>1</sup>, Feisi Liang<sup>1</sup>, Haoliang Huang<sup>1</sup>, Xiuyin Teng<sup>1</sup>, Shaohua Li<sup>1,4</sup>,  
Jaloliddin Nuriddinov<sup>3</sup>, Michael E. Selzer<sup>1,2</sup>, and Yang Hu<sup>1,\*</sup>

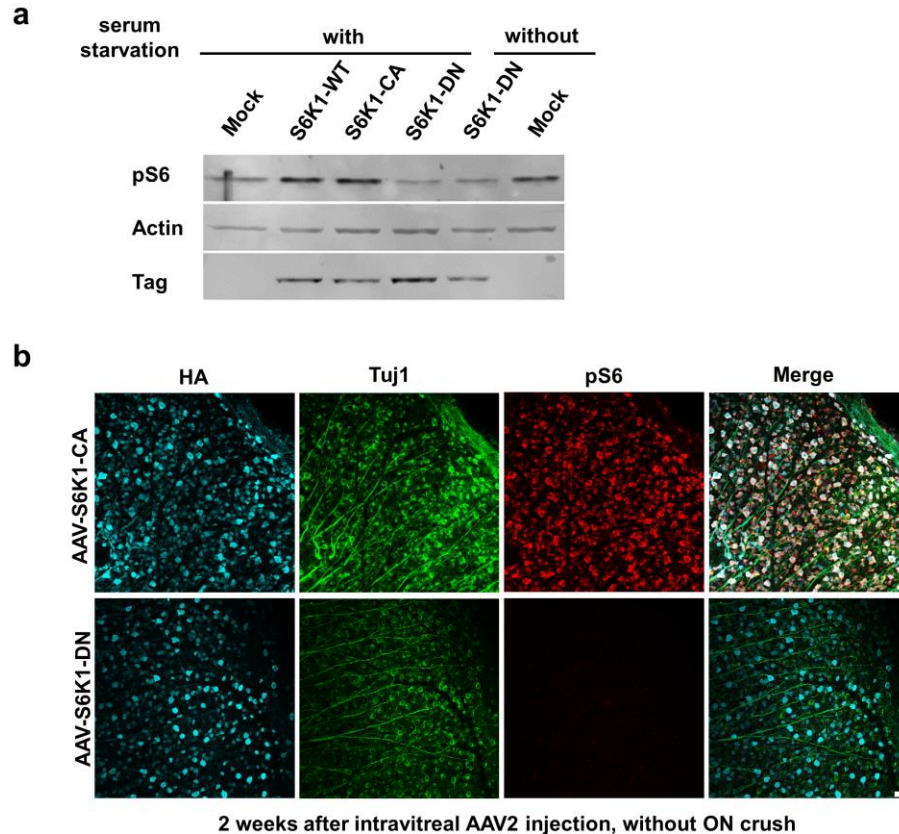

Supplementary Fig. 1

**Supplementary Figure 1 S6K1-CA activates and S6K1-DN inhibits S6K1 activity in vitro and in vivo.** (a) Western blot detection of protein expression after transient transfection of HEK293T cells with S6K1-WT, S6K1-CA or S6K1-DN, with or without serum starvation. (b) Representative confocal images of whole-mount retinas showing HA tag, blue; TUJ1 positive RGCs, green; pS6, red; merged images; 2 weeks after injection with AAV-S6K1-CA or AAV-S6K1-DN. Scale bar, 20  $\mu$ m.

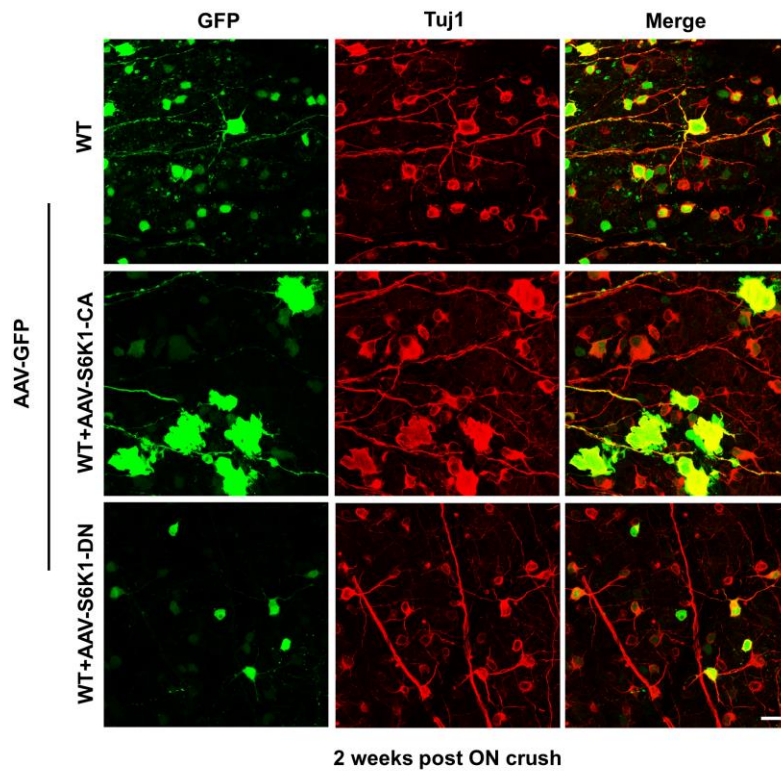

Supplementary Fig. 2

**Supplementary Figure 2 S6K1 regulates RGC size.** Representative confocal images of RGCs in whole-mount retinas showing GFP, green; Tuj1, red; merged images; 2 weeks after ON crush, GFP signal indicates enlarged RGC bodies in WT mice injected with AAV-S6K1-CA (middle row) and smaller RGC bodies with injection of AAV-S6K1-DN (bottom row). Scale bar, 20  $\mu$ m.

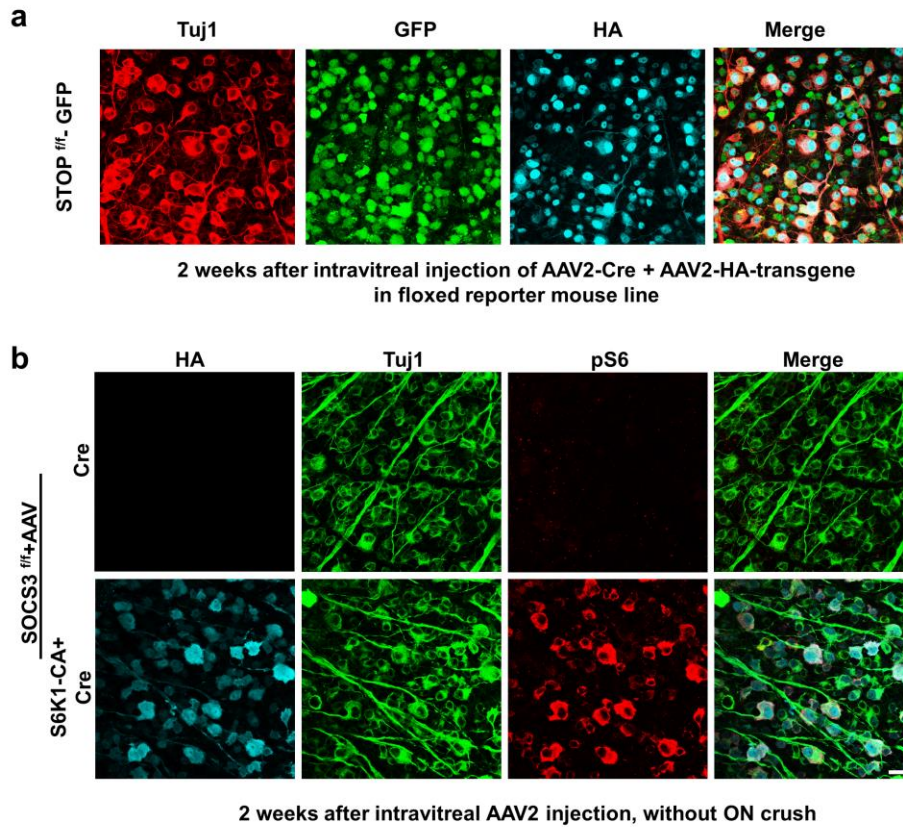

Supplementary Fig. 3

**Supplementary Figure 3 Mixed injection of AAV-Cre + AAV-HA-transgene achieves high transgenic efficiency *in vivo*.** (a) Representative confocal images of whole-mount retinas showing Tuj1 positive RGCs, red; GFP expression after Cre expression, green; HA tag, blue; merged images; 2 weeks after injection with AAV-Cre + AAV-HA-transgene in flox-stop-flox-GFP reporter mouse line. Scale bar, 20  $\mu\text{m}$ . (b) Representative confocal images of whole-mount retinas showing Tuj1 positive RGCs, the expression of HA-S6K1 and pS6 level, 2 weeks after intravitreal injection with AAV-Cre + AAV-HA-S6K1 in SOCS3 floxed mouse line. Scale bar, 20  $\mu\text{m}$ .

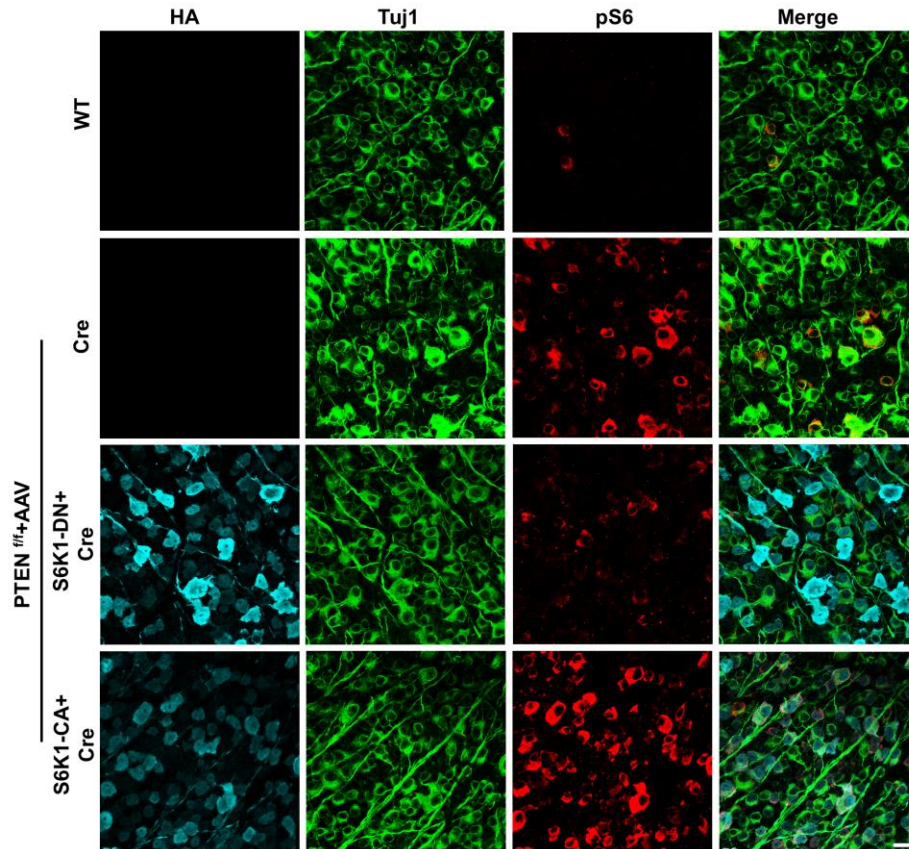

2 weeks after intravitreal AAV2 injection, without ON crush

Supplementary Fig. 4

**Supplementary Figure 4. S6K1 activation and inhibition in PTEN KO mice by mixed injection of AAV-Cre+AAV-S6K1-CA and AAV-Cre+AAV-S6K1-DN in PTEN<sup>fl/fl</sup> mice.** Representative confocal images of whole-mount retinas showing HA tag, blue; Tuj1 positive RGCs, green; pS6, red; merged images; in WT mice; 2 weeks after injection with AAV-Cre alone or AAV-Cre + AAV-S6K1-DN or AAV-Cre + AAV-S6K1-CA in PTEN floxed mice, Scale bar, 20  $\mu$ m.

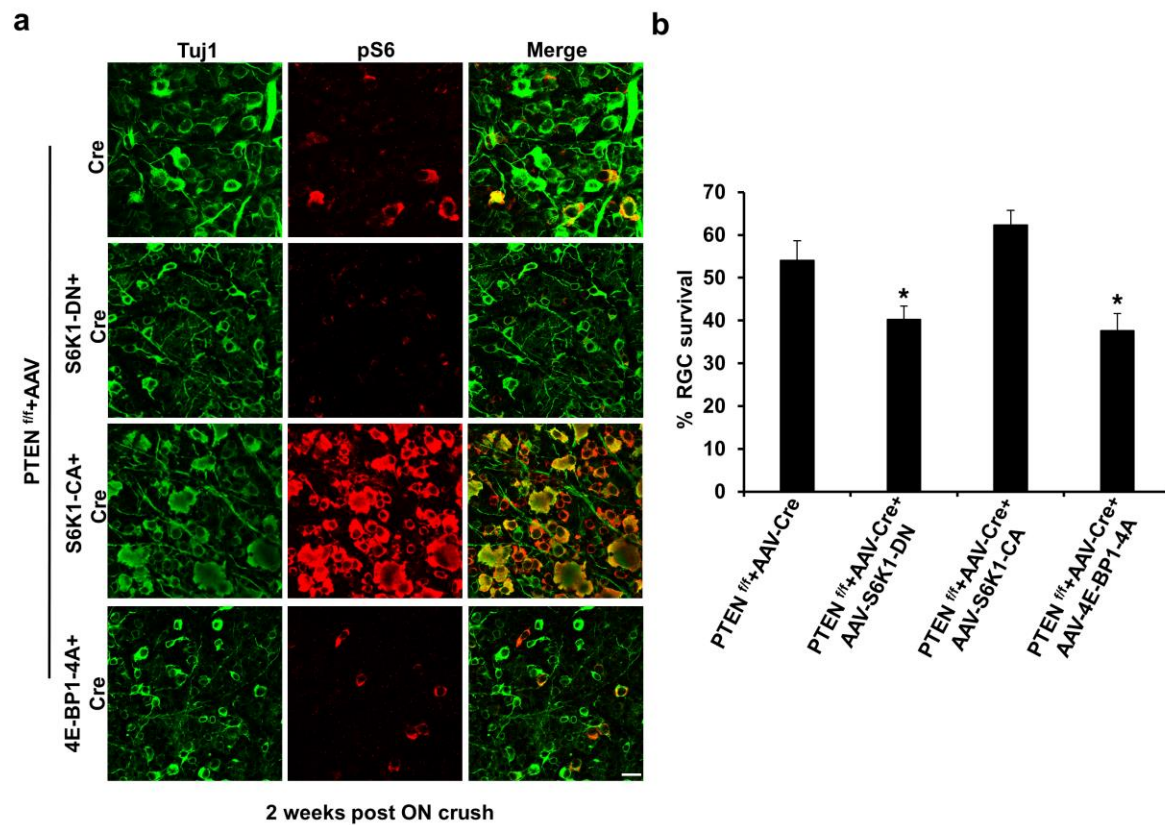

Supplementary Fig. 5

**Supplementary Figure 5. S6K1 inhibition and 4E-BP activation decrease RGC survival in PTEN KO mice** (a) Confocal images of whole-mount retinas showing surviving Tuj1 positive RGCs and p-S6 immunostaining, 2 weeks after ON crush. Scale bar, 20  $\mu$ m. (b) Quantification of surviving RGCs, represented as percentage of Tuj1 positive RGCs in the injured eye, compared to the intact contralateral eye, 2 weeks after ON crush. \*:  $p < 0.05$ . Data are presented as means  $\pm$  s.e.m,  $n = 8-12$ .

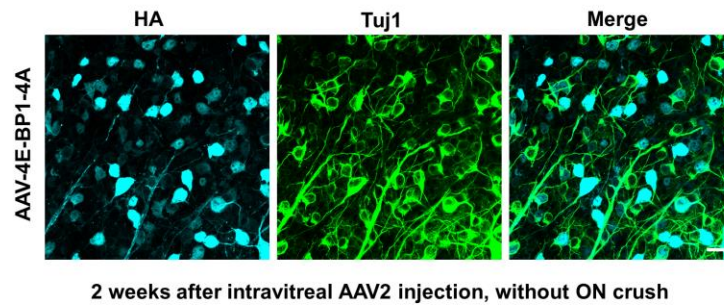

Supplementary Fig. 6

**Supplementary Figure 6. HA-tagged AAV-4E-BP1-4A achieves high infection efficiency *in vivo*.** Representative confocal images of RGCs in whole-mount retinas showing HA expression, blue; Tuj1, green; merged image; in WT mice, 2 weeks after injection with AAV-HA-4E-BP1-4A, Scale bar, 20  $\mu\text{m}$
